# Supplementary material for: A new large-bodied thalattosuchian crocodyliform from the Lower Jurassic (Toarcian) of Hungary, with further evidence of the mosaic acquisition of marine adaptations in Metriorhynchoidea
Source: PeerJ. 2018 May 10;6:e4668. doi: 10.7717/peerj.4668 (PMC5949208; doi:10.7717/peerj.4668)
Supplement: Supplemental Information 2 [file peerj-06-4668-s002.xlsx]

## Sheet: mA dataset
Taxon	1	2	3	4	5	6	7	8	9	10	11	12	13	14	15	16	17	18	19	20	21	22	23	24	25	26	27	28	29	30	31	32	33	34	35	36	37	38	39	40	41	42	43	44	45	46	47	48	49
Gracilisuchus_stipanicicorum	1	0	0	0	1	2	0	0	1	0	0	0	0	-	-	-	-	-	-	-	?	0	0	?	?	0	?	0	0	0	0	0	-	0	0	0	0	2	0	1	0	0	0	1	0	1	1	0	2
Pseudhesperosuchus_jachaleri	0	4	0	0	1	2	0	0	0	1	0	?	0	-	-	-	-	-	-	-	0	?	0	?	?	0	?	0	0	0	0	0	-	0	0	0	0	2	0	?	0	0	0	1	0	1	1	0	2
Sphenosuchus_acutus	0	4	0	0	1	2	0	0	0	1	0	?	0	-	-	-	-	-	-	-	0	0	0	?	?	0	?	0	0	0	0	0	-	0	0	0	0	2	0	1	0	0	0	1	0	1	1	0	2
Junggarsuchus_sloani	0	0	0	0	1	2	0	0	0	1	0	?	0	?	-	-	-	-	-	-	0	0	0	?	?	0	0	0	0	0	0	0	-	0	0	0	0	?	?	?	0	0	0	1	0	1	1	0	2
Protosuchus_richardsoni	0	0	0	0	0	1	0	0	?	1	0	?	?	?	1	?	?	?	?	?	1	1	0	1	1	0	0	0	1	0	0	0	-	0	0	0	0	2	0	1	0	0	0	1	0	1	0	0	1
Hemiprotosuchus_leali	0	0	0	0	0	1	0	0	0	1	0	?	1	?	1	1	1	0	?	?	?	1	0	?	?	0	?	0	0	0	0	0	-	0	0	0	0	2	0	?	0	0	0	1	0	1	0	0	1
Gobiosuchus_kielanae	1	0	0	0	0	1	0	0	0	1	0	?	?	?	?	?	?	?	?	?	0	0	0	?	?	?	?	?	0	0	0	0	-	0	0	0	0	2	0	?	0	0	0	1	0	1	0	0	1
Hsisosuchus_chowi	1	0	0	0	1	1	0	0	1	1	0	0	1	1	0	1	1	1	1	1	0	0	?	?	1	0	?	0	?	0	0	0	-	?	?	?	0	?	?	?	?	?	0	?	?	?	?	?	?
Hsisosuchus_chungkingensis	1	0	0	0	?	?	0	0	0	1	0	0	1	1	0	1	1	1	1	1	0	0	?	?	1	0	?	0	?	?	0	?	-	?	?	?	?	?	?	?	?	?	?	1	0	1	0	0	1
Hsisosuchus_dashanpuensis	1	0	0	0	1	1	0	0	1	1	0	0	1	1	0	1	1	1	?	?	0	0	?	1	1	0	?	0	0	0	0	0	-	0	?	0	0	2	0	?	?	0	0	1	0	1	0	0	1
Notosuchus_terrestris	1	4	0	0	0	1	0	0	0	1	0	1	0	-	0	-	-	-	-	-	0	0	0	1	1	0	0	0	1	0	0	0	-	0	0	1	0	0	-	0	1	0	0	1	0	0	0	0	0
Mariliasuchus_amarali	1	4	0	0	0	1	0	0	0	1	0	1	0	-	0	-	-	-	-	-	0	0	0	1	1	0	0	0	1	0	0	0	-	0	0	1	0	0	-	0	1	0	0	0	0	-	-	-	0
Yacarerani_boliviensis	1	4	0	0	0	1	0	0	0	1	1	1	0	-	0	-	-	-	-	-	0	0	0	1	1	0	0	0	?	0	0	0	-	0	0	1	0	?	?	1	1	0	0	0	0	-	-	-	0
Adamantinasuchus_navae	0	?	?	?	0	1	0	0	?	1	1	1	0	-	0	-	-	-	-	-	?	?	0	1	1	0	0	0	1	0	0	0	-	0	0	1	0	0	-	0	1	0	0	0	0	-	-	-	0
Armadillosuchus_arrudai	0	?	?	?	0	1	0	0	0	1	?	1	0	-	0	-	-	-	-	-	?	?	?	?	?	?	?	?	1	0	0	0	-	0	0	1	0	0	-	0	?	0	0	0	0	-	-	-	0
Sphagesaurus_huenei	0	{04}	0	0	0	1	0	0	1	1	1	1	0	-	0	-	-	-	-	-	0	?	0	1	1	0	0	?	1	0	0	0	-	0	0	1	?	0	-	0	1	0	0	0	0	-	-	-	0
Caipirasuchus_montealtensis	0	{04}	0	0	0	1	0	0	1	1	1	1	0	-	0	-	-	-	-	-	1	0	0	1	1	0	0	0	1	0	0	0	-	0	0	1	0	0	-	0	1	0	0	1	0	0	0	0	0
Caryonosuchus_pricei	?	?	?	?	?	1	?	?	?	?	0	1	1	0	?	?	?	?	?	?	1	?	0	1	1	0	0	?	0	?	0	0	-	?	?	1	0	?	-	?	?	?	0	0	0	-	-	-	0
Comahuesuchus_brachybuccalis	0	4	0	0	0	1	0	0	1	1	0	1	0	-	?	-	-	-	-	-	0	0	0	?	?	0	?	0	?	?	0	0	-	0	0	1	0	0	-	?	1	0	0	0	0	-	-	-	0
Baurusuchus_pachecoi	0	4	0	0	2	2	0	0	?	0	0	1	0	-	0	-	-	-	-	-	1	0	0	1	1	0	0	0	1	0	0	0	-	0	0	1	0	2	0	1	1	0	0	0	0	-	-	-	0
Stratiotosuchus_maxhechti	0	4	0	0	2	2	0	0	?	0	0	1	0	-	0	-	-	-	-	-	1	0	0	1	1	0	0	0	0	0	0	0	-	0	0	1	0	2	0	1	1	0	0	0	0	-	-	-	0
Malawisuchus_mwakasyungutiensis	0	0	0	0	0	1	0	0	1	1	0	?	?	?	0	?	?	?	?	?	?	0	0	?	1	0	0	?	1	0	0	0	-	0	?	?	0	2	?	1	{12}	0	0	1	0	0	1	0	0
Candidodon_itapecuruense	0	0	0	0	1	1	0	0	2	1	1	0	1	2	0	1	1	?	?	?	0	0	0	1	1	0	0	?	1	0	0	0	-	0	?	1	0	0	-	?	1	0	0	1	0	0	0	0	0
Uruguaysuchus_aznarezi	0	0	0	0	1	1	0	0	2	1	1	0	1	2	0	1	1	1	?	?	0	0	0	1	1	0	0	0	1	0	0	0	-	0	?	1	0	0	-	0	?	0	0	1	0	0	0	0	0
Araripesuchus_patagonicus	1	0	0	0	1	1	0	0	1	1	0	0	1	2	0	1	0	0	0	?	0	0	0	?	?	?	0	0	1	?	0	0	-	0	?	?	0	2	?	1	{12}	0	0	1	0	0	0	0	0
Araripesuchus_gomesii	1	0	0	0	1	1	0	0	1	1	0	0	1	2	0	1	1	0	0	1	0	0	0	1	0	1	0	0	1	0	0	0	-	0	0	0	0	2	1	1	2	0	0	1	0	0	0	0	0
Araripesuchus_wegeneri	1	0	0	0	1	1	0	0	1	1	0	0	1	2	0	1	1	0	?	1	0	0	0	1	0	1	0	0	1	0	0	0	-	0	0	0	0	2	1	1	2	0	0	1	0	0	0	0	0
Araripesuchus_buitreraensis	1	?	?	?	1	1	0	0	1	1	0	?	?	?	0	?	?	?	?	?	0	0	?	?	?	?	?	?	0	0	0	0	-	0	?	?	0	?	?	1	2	0	0	1	0	?	0	0	0
Araripesuchus_tsangatsangana	0	0	0	0	1	1	0	0	1	2	0	0	1	?	0	1	1	0	0	?	0	0	0	?	1	0	0	0	0	0	0	0	-	0	?	0	0	?	?	1	2	0	0	1	0	0	0	0	0
Crato_Form	?	0	0	0	1	1	0	0	1	1	0	0	1	2	0	1	1	0	0	0	0	0	0	1	1	0	0	0	1	0	0	0	-	0	0	0	0	2	1	1	2	0	0	1	0	0	0	0	0
Libycosuchus_brevirostris	0	0	0	0	1	1	0	0	1	1	0	0	1	2	0	1	1	1	?	?	0	0	0	1	1	0	0	0	?	0	0	0	-	0	0	1	0	2	1	1	2	0	0	1	0	?	0	0	0
Lomasuchus_palpebrosus	0	0	0	0	1	1	0	0	1	0	0	0	1	0	?	1	1	1	?	?	0	0	0	?	0	0	0	?	?	?	0	0	-	0	?	?	?	?	?	?	2	0	?	1	0	?	0	0	0
Montealtosuchus_arrudacamposi	0	0	0	0	1	1	0	0	1	0	0	0	1	0	0	1	1	1	1	1	0	0	?	1	0	0	0	0	1	0	0	0	-	0	0	?	0	2	1	1	2	0	0	1	0	0	0	0	0
Uberabasuchus_terrificus	0	4	0	0	1	1	0	0	1	1	0	0	1	{12}	0	1	1	1	1	1	0	0	0	1	0	0	0	0	0	0	0	0	-	0	0	0	0	2	1	1	2	0	0	1	0	0	0	0	0
cf_Hamadasuchus_rebouli	0	5	0	0	2	2	0	0	1	1	0	0	1	0	0	1	1	1	?	?	0	0	0	0	0	0	0	0	0	0	0	0	-	0	0	0	1	2	1	1	2	0	0	1	0	0	0	0	0
Caririsuchus_camposi	?	?	?	?	2	1	0	0	1	1	0	0	1	?	0	1	1	1	?	?	?	?	?	?	?	?	?	?	?	?	?	1	0	0	0	0	1	2	0	1	?	?	0	0	0	-	-	-	0
Sebecus_icaeorhinus	0	5	0	0	1	2	0	0	1	?	1	0	1	2	0	1	1	1	1	1	0	?	0	0	0	0	0	0	0	0	0	1	0	0	0	?	1	{12}	0	1	0	0	?	?	?	?	?	?	?
Bergisuchus_dietrichtbergi	?	?	?	?	?	2	0	0	1	1	1	0	1	2	?	?	?	?	?	?	?	?	?	?	?	?	?	0	?	?	0	{01}	?	?	?	?	?	?	?	?	?	0	?	1	0	0	0	0	0
SMNS_81977	?	?	?	?	1	?	?	?	?	?	?	?	?	?	?	?	?	?	?	?	?	?	?	?	?	?	?	0	?	?	?	?	?	?	?	?	?	?	?	?	?	?	?	?	?	?	?	?	?
Anatosuchus_minor	1	?	?	?	1	0	0	0	2	1	0	0	1	1	0	1	1	0	1	1	0	0	0	1	1	0	0	0	1	0	0	0	-	0	?	0	0	2	1	1	2	0	0	1	0	0	1	0	0
Kaprosuchus_saharicus	0	?	?	0	3	0	0	0	2	1	0	?	?	1	0	1	1	0	0	0	0	0	0	1	1	0	0	0	0	1	0	2	4	0	1	0	0	1	0	0	1	0	0	1	0	0	1	0	0
Mahajangasuchus_insignis	1	?	?	0	?	0	0	0	2	1	0	?	?	?	0	1	1	0	0	1	0	0	?	?	1	0	0	0	1	?	0	{12}	?	?	?	0	?	?	?	?	?	?	?	1	0	0	1	0	0
Theriosuchus_pusillus	1	{12}	?	1	0	0	0	0	1	1	0	0	1	1	0	1	1	?	1	?	0	0	1	?	1	0	0	0	0	0	0	1	?	0	0	0	0	2	0	1	0	0	0	1	0	?	?	?	0
Knoetschkesuchus_guimarotae	1	?	?	?	0	0	0	0	1	?	0	0	1	1	?	1	1	?	1	1	0	0	?	?	1	0	0	?	0	0	0	1	?	0	?	?	0	2	0	1	0	?	0	1	0	0	0	0	0
Stolokrosuchus_lapparenti	1	2	1	1	3	?	0	0	1	1	0	0	1	?	0	?	?	?	?	?	0	?	?	?	?	?	?	?	1	0	0	1	0	0	0	1	1	2	0	1	{12}	0	0	1	0	?	1	0	1
Calsoyasuchus_valliceps	1	?	?	?	3	0	0	0	1	1	0	0	1	1	0	1	?	?	?	?	0	?	?	1	1	0	1	?	0	0	0	1	0	0	0	0	1	0	-	0	0	0	0	1	0	1	1	0	1
Eutretauranosuchus_delfsi	1	1	0	1	1	0	0	0	1	{12}	0	0	1	0	0	1	1	1	1	1	0	0	1	?	1	0	1	0	0	0	0	2	0	0	0	0	1	0	-	0	0	?	0	0	0	-	-	-	0
Sunosuchus_junggarensis	1	?	?	?	2	0	0	0	1	?	0	0	1	0	0	1	1	1	?	?	0	0	?	?	1	0	?	?	0	0	0	2	0	0	0	0	1	0	-	0	0	?	0	0	0	-	-	-	0
Sunosuchus_miaoi	1	2	1	1	{12}	0	0	0	0	{12}	0	0	1	?	0	1	1	1	1	1	0	0	?	?	?	?	?	?	?	?	0	?	?	?	?	?	?	?	?	?	?	?	?	0	0	-	-	-	0
Siamosuchus_phuphokensis	1	{12}	?	1	1	0	0	0	1	?	0	0	1	0	0	1	1	?	?	?	0	?	?	?	?	0	?	?	0	1	0	2	0	0	?	0	1	0	-	0	0	?	0	0	0	-	-	-	0
Amphicotylus_lucasii	1	2	1	1	1	0	0	0	1	1	0	0	1	?	0	1	1	1	?	?	0	0	1	1	1	0	?	0	0	1	0	2	0	0	?	0	1	0	-	0	0	1	0	0	0	-	-	-	0
Nannosuchus_gracilidens	1	2	1	1	1	0	0	0	1	1	0	0	1	?	0	1	1	1	?	?	?	?	1	?	1	0	1	?	0	0	0	2	0	0	1	0	1	0	-	0	0	?	0	0	0	-	-	-	0
Goniopholis_baryglyphaeus	1	?	?	?	1	0	0	0	1	1	0	0	1	0	0	1	1	1	1	1	0	0	1	?	1	0	1	0	0	?	0	?	?	?	?	?	1	0	-	?	0	1	0	0	0	-	-	-	0
Goniopholis_kiplingi	1	2	1	1	2	0	0	0	1	1	0	0	1	0	0	1	1	1	?	?	0	?	?	1	1	0	1	?	0	1	0	2	1	0	1	0	1	0	-	0	0	1	0	0	0	-	-	-	0
Goniopholis_simus	1	2	1	1	1	0	0	0	1	1	0	0	1	0	0	1	1	1	1	1	0	0	1	1	1	0	1	0	0	1	0	2	1	0	1	0	1	0	-	0	0	1	0	0	0	-	-	-	0
Anteophthalmosuchus_hooleyi	1	2	1	1	1	0	0	0	1	1	0	0	1	0	0	1	1	1	1	1	0	0	1	?	1	0	1	0	0	?	0	?	?	?	?	?	1	?	?	?	?	?	?	0	0	-	-	-	0
Anteophthalmosuchus_epikrator	1	2	1	1	1	0	0	0	1	1	0	0	1	0	0	1	1	1	1	1	0	?	1	1	1	0	1	0	0	1	0	2	0	0	1	0	1	0	-	0	0	?	0	0	0	-	-	-	0
Hulkeopholis_willetti	1	2	1	1	3	0	0	0	1	1	0	0	1	0	0	1	1	1	?	?	0	0	1	?	1	0	1	?	0	1	0	2	0	0	1	0	1	0	-	0	0	1	0	0	0	-	-	-	0
Anteophthalmosuchus_escuchae	1	2	1	1	?	0	?	?	1	1	0	0	1	1	?	1	1	1	1	1	0	?	1	1	1	0	1	0	?	?	0	?	?	?	?	?	?	?	?	?	?	?	?	0	0	-	-	-	0
Hulkeopholis_plotos	1	2	1	1	1	0	0	0	1	1	0	0	1	0	0	1	1	1	1	1	0	0	1	1	1	0	1	?	0	1	0	2	0	0	1	0	1	0	-	0	0	1	0	0	0	-	-	-	0
Elosuchus_cherifiensis	1	2	1	1	2	0	0	0	1	2	0	0	1	1	0	1	1	1	?	?	0	0	1	1	?	0	0	-	0	0	0	2	0	0	0	0	1	0	-	0	0	0	0	0	0	-	-	-	0
Elosuchus_broinae	1	2	1	1	2	0	0	0	1	2	0	0	1	1	0	1	1	1	?	?	0	0	1	1	?	0	0	-	0	0	0	2	0	0	0	0	1	0	-	0	0	0	0	0	0	-	-	-	0
Vectisuchus_leptognathus	1	{12}	?	1	2	1	0	0	0	2	0	0	1	1	0	1	1	1	1	1	?	0	1	?	1	0	0	-	0	0	0	?	?	?	?	?	?	?	-	?	?	?	0	0	0	-	-	-	0
Pholidosaurus_schaumburgensis	1	0	1	1	3	0	0	0	0	2	0	0	1	1	0	1	1	1	?	?	0	0	?	?	?	0	0	-	0	?	0	2	?	?	?	?	?	?	-	?	0	?	?	0	0	-	-	-	0
Pholidosaurus_sp_(Charente)	1	2	1	1	2	0	0	0	0	2	0	0	1	1	0	1	1	1	1	1	0	0	1	?	?	0	0	-	?	0	0	2	0	0	0	0	1	0	-	0	0	0	0	0	0	-	-	-	0
Chalawan_thailandicus	1	?	?	?	2	1	0	1	0	?	0	0	1	?	?	1	?	?	1	1	0	?	?	?	?	?	?	?	?	0	?	1	0	0	?	0	1	0	-	0	?	?	?	0	0	-	-	-	0
Sarcosuchus_hartti	?	?	?	?	?	0	0	1	?	?	?	?	?	?	?	?	?	?	?	?	?	?	1	?	?	?	?	0	?	?	?	?	?	?	?	?	?	?	-	?	?	0	?	?	?	?	?	?	?
Sarcosuchus_imperator	1	2	1	1	2	0	0	1	1	2	0	0	1	1	0	1	1	1	1	1	0	0	1	?	?	0	0	0	0	0	0	1	0	0	0	0	1	0	-	0	0	0	0	0	0	-	-	-	0
Pholidosaurus_purbeckensis	1	1	1	1	?	0	0	0	1	2	0	0	1	1	0	1	1	1	?	?	0	0	?	?	?	0	0	?	?	?	0	?	?	?	?	?	?	?	?	?	?	?	?	0	0	-	-	-	0
Congosaurus_bequaerti	1	?	?	?	{23}	1	0	0	1	2	0	0	1	1	?	1	?	?	1	1	0	?	1	0	0	0	0	-	0	0	0	2	0	0	0	0	1	0	-	0	?	0	?	0	0	-	-	-	0
Dyrosaurus_maghribensis	1	5	1	0	2	1	0	0	1	2	0	0	1	1	0	1	1	1	0	0	0	0	1	0	0	0	0	-	0	0	0	2	0	0	0	0	1	0	-	0	0	0	0	0	0	-	-	-	0
Dyrosaurus_phosphaticus	1	?	?	0	{23}	1	0	0	1	2	0	0	1	1	?	1	1	1	?	?	0	?	1	0	0	0	0	-	0	0	0	2	0	0	0	0	1	0	-	0	0	0	0	0	0	-	-	-	0
Guarinisuchus_munizi	1	5	1	0	1	1	0	0	1	1	0	0	1	1	0	1	1	1	?	?	0	0	1	0	0	0	0	-	0	?	?	2	0	0	0	0	1	0	-	0	0	0	0	0	0	-	-	-	0
Rugosuchus_nonganensis	1	{12}	?	1	2	0	0	0	0	?	0	0	1	1	0	1	1	1	1	1	0	0	?	?	?	0	0	?	0	0	0	{12}	?	0	?	0	0	2	0	?	0	0	0	0	0	-	-	-	0
Bernissartia_fagesii	1	1	0	1	0	0	0	0	1	1	0	0	1	1	0	1	1	1	1	1	0	0	1	?	1	0	0	0	0	0	0	2	0	0	0	0	1	0	-	0	0	0	0	0	0	-	-	-	0
Susisuchus_anatoceps	1	1	0	1	2	0	0	0	2	1	0	0	1	1	0	1	1	1	0	0	?	?	1	?	1	0	0	?	0	0	0	2	2	0	0	0	1	0	-	0	0	0	0	0	0	-	-	-	0
Isisfordia_duncani	1	1	0	1	2	0	0	0	1	1	0	0	1	1	0	1	1	1	?	?	0	0	?	?	?	0	?	?	0	0	0	2	2	0	0	0	1	0	-	0	0	0	0	0	0	-	-	-	0
Allodaposuchus_precedens	1	?	?	1	1	0	0	0	1	?	0	0	1	1	0	1	1	1	?	?	0	0	?	?	?	?	0	?	0	0	0	2	0	0	0	0	1	0	-	0	0	0	0	0	0	-	-	-	0
Iharkutosuchus_makadii	1	?	?	1	0	0	0	0	1	{01}	0	0	1	1	0	?	?	?	?	?	0	0	?	?	?	?	0	?	0	0	0	2	0	0	0	0	1	0	-	0	0	0	0	0	0	-	-	-	0
Hylaeochampsa_vectiana	1	?	0	?	?	?	?	?	1	?	0	?	1	1	0	?	?	?	?	?	0	0	?	?	1	?	0	?	?	?	0	?	?	?	?	?	1	?	?	?	?	?	0	0	0	-	-	-	0
Gavialis_gangeticus	1	1	0	1	3	1	0	0	0	2	0	0	1	1	0	1	0	0	0	1	0	0	1	0	0	0	0	-	0	0	0	2	2	1	0	0	1	0	-	0	0	0	0	0	0	-	-	-	0
Piscogavialis_jugalisperforatus	1	1	0	1	3	1	0	0	1	2	0	0	1	1	0	1	0	0	?	?	0	0	1	0	0	0	0	-	0	0	0	2	2	1	0	0	1	0	-	0	0	0	0	0	0	-	-	-	0
Eosuchus_lerichei	1	1	0	1	3	0	0	0	1	1	0	0	1	1	0	1	0	1	?	1	0	0	1	0	0	0	0	-	0	0	0	2	2	1	0	0	1	0	-	0	0	0	0	0	0	-	-	-	0
Tomistoma_schlegelii	1	1	0	1	3	0	0	0	1	2	0	0	1	1	0	1	1	0	0	1	0	0	1	0	0	0	0	-	0	0	0	2	2	1	0	0	1	0	-	0	0	0	0	0	0	-	-	-	0
Crocodylus_niloticus	1	1	0	1	2	0	0	0	1	1	0	0	1	1	0	1	1	1	1	1	0	0	1	0	0	0	0	1	0	0	0	2	2	1	0	0	1	0	-	0	0	0	0	0	0	-	-	-	0
Crocodylus_porosus	1	1	0	1	3	0	0	0	1	1	0	0	1	1	0	1	1	1	1	1	0	0	1	0	0	0	0	1	0	0	0	2	2	1	0	0	1	0	-	0	0	0	0	0	0	-	-	-	0
Osteolaemus_tetraspis	1	1	0	1	1	0	0	0	1	1	0	0	1	1	0	1	1	1	1	1	0	0	1	0	0	0	0	1	0	0	0	2	0	1	0	0	1	1	0	1	0	0	0	0	0	-	-	-	0
Voay_robustus	1	1	0	1	1	0	0	0	1	1	0	0	1	1	0	1	1	1	1	1	0	0	1	0	0	0	0	1	0	0	0	2	0	1	0	?	1	0	-	0	0	0	0	0	0	-	-	-	0
Brachychampsa_montana	1	1	0	1	1	0	0	0	1	?	0	0	1	1	0	1	1	1	1	1	0	0	1	0	0	0	0	1	0	0	0	2	2	0	0	0	1	0	-	0	0	0	0	0	0	-	-	-	0
Diplocynodon_ratelli	1	1	0	1	1	0	0	0	1	1	0	0	1	1	0	1	1	1	1	1	0	0	1	0	0	0	0	1	0	0	0	2	0	1	0	0	1	0	-	0	0	0	0	0	0	-	-	-	0
Alligator_mississipiensis	1	1	0	1	1	0	0	0	1	2	0	0	1	1	0	1	1	1	1	1	0	0	1	0	0	0	0	1	0	0	0	2	0	1	0	0	1	1	0	1	0	0	0	0	0	-	-	-	0
Caiman_crocodilus	1	1	0	1	1	0	0	0	1	2	0	0	1	1	0	1	1	1	1	1	0	0	1	0	0	0	0	1	0	0	0	2	0	1	0	0	1	0	-	0	0	0	0	0	0	-	-	-	0
Caiman_latirostris	1	1	0	1	1	0	0	0	1	2	0	0	1	1	0	1	1	1	1	1	0	0	1	0	0	0	0	1	0	0	0	2	0	1	0	0	1	0	-	0	0	0	0	0	0	-	-	-	0
Melanosuchus_niger	1	1	0	1	1	0	0	0	1	2	0	0	1	1	0	1	1	1	1	1	0	0	1	0	0	0	0	1	0	0	0	2	0	1	0	0	1	0	-	0	0	0	0	0	0	-	-	-	0
Paleosuchus_trigonatus	1	1	0	1	1	0	0	0	1	2	0	0	1	1	0	1	1	1	?	?	0	0	1	0	0	0	0	1	0	0	0	2	0	1	0	0	1	0	-	0	0	0	0	0	0	-	-	-	0
Platysuchus_multiscrobiculatus	1	5	0	0	2	1	0	0	1	?	0	0	1	0	1	1	0	?	0	0	?	0	1	1	1	0	0	-	0	0	0	1	0	0	0	0	1	0	-	0	0	0	1	1	0	0	0	0	0
Steneosaurus_bollensis	1	3	1	0	2	1	0	0	1	?	0	0	1	0	1	1	0	?	0	0	0	0	1	1	1	0	0	-	0	0	0	1	0	0	0	0	1	0	-	0	0	0	1	1	0	0	0	0	0
Steneosaurus_herberti	1	3	1	0	2	1	0	0	1	2	0	0	1	0	1	?	?	?	0	0	0	0	1	1	1	0	0	-	0	0	0	1	0	0	0	0	1	0	-	0	0	0	1	0	0	-	-	-	0
Pelagosaurus_typus	1	2	1	0	2	1	0	0	1	2	0	0	1	0	1	0	0	?	1	1	0	0	1	1	1	0	0	-	0	0	0	1	0	0	0	0	1	0	-	0	0	0	1	1	0	1	0	1	0
Magyarosuchus_fitosi	?	?	?	?	?	?	?	?	?	?	?	?	?	?	?	?	?	?	?	?	?	?	?	?	?	?	?	?	?	?	?	?	?	?	?	?	?	?	?	?	?	?	?	?	?	?	?	?	?
Cricosaurus_suevicus	0	3	1	?	2	1	0	0	1	0	0	0	0	-	-	-	-	-	-	-	?	?	1	1	1	0	0	-	0	0	1	1	3	1	0	0	1	3	0	1	0	0	1	0	1	2	0	1	0
Cricosaurus_araucanensis	0	3	1	0	2	1	0	0	1	0	0	0	0	-	-	-	-	-	-	-	0	0	1	1	1	0	0	-	0	0	1	1	3	1	0	0	1	3	0	1	0	0	1	0	1	2	0	1	0
Rhacheosaurus_gracilis	1	3	1	0	2	1	0	0	0	2	0	0	0	-	-	-	-	-	-	-	?	?	1	?	1	0	0	-	0	0	0	1	3	1	0	0	1	3	0	1	0	0	?	0	1	2	0	1	0
Metriorhynchus_superciliosus	1	3	1	0	1	1	0	0	1	0	0	0	1	-	-	-	-	-	-	-	0	0	1	1	1	0	0	-	0	0	?	1	3	0	0	0	1	0	-	0	0	0	1	0	1	2	0	1	0
Torvoneustes_carpenteri	?	?	?	?	1	1	0	0	?	0	0	0	0	-	-	-	-	-	-	-	0	?	?	?	?	0	0	?	0	0	?	1	3	0	0	0	1	0	-	0	0	0	1	0	?	?	0	1	0
Geosaurus_giganteus	?	?	?	?	1	?	0	0	0	0	0	0	0	-	-	-	-	-	-	-	0	?	1	1	1	0	0	0	?	0	1	?	?	?	?	?	?	?	-	?	0	?	?	0	1	2	0	1	0
Geosaurus_grandis	?	3	1	0	1	2	0	0	0	0	0	0	0	-	-	-	-	-	-	-	?	0	1	1	1	0	0	0	0	0	1	1	3	0	0	0	1	0	-	0	0	0	?	0	?	2	0	1	0
Geosaurus_sp	?	?	?	?	?	?	?	?	?	?	?	?	?	?	?	?	?	?	?	?	?	?	?	?	?	?	?	?	?	?	?	?	?	?	?	?	?	?	?	?	?	?	?	?	?	?	?	?	?
Dakosaurus_maximus	?	3	1	?	1	2	1	0	0	0	0	0	0	-	-	-	-	-	-	-	0	?	1	1	1	0	0	0	0	0	?	1	3	0	0	0	1	0	-	0	0	0	1	0	?	2	0	1	0
Dakosaurus_andiniensis	0	3	1	0	1	2	1	0	0	0	0	0	0	-	-	-	-	-	-	-	0	0	1	1	1	0	0	0	0	0	0	1	3	0	0	0	1	0	-	0	0	0	?	0	1	2	0	1	1
[truncated: 521 more columns]

## Sheet: HY dataset
Taxa	1	2	3	4	5	6	7	8	9	10	11	12	13	14	15	16	17	18	19	20	21	22	23	24	25	26	27	28	29	30	31	32	33	34	35	36	37	38	39	40	41	42	43	44	45	46	47	48	49
Postosuchus_kirkpatricki	0	?	?	0	?	0	2	?	0	0	?	2	?	?	?	0	0	1	1	0	0	0	0	0	0	0	?	1	0	0	0	2	0	0	?	0	0	3	0	?	0	0	?	2	0	0	0	1	1
Dromicosuchus_grallator	?	?	?	0	?	0	2	0	0	0	0	2	1	?	?	?	0	?	0	0	?	?	0	0	?	0	0	1	0	0	0	2	0	0	?	0	0	0	1	?	0	0	?	2	0	0	0	1	1
Hesperosuchus_cf_agilis	?	?	?	0	?	0	2	0	0	0	0	2	1	?	?	?	0	?	0	0	?	?	0	0	0	0	0	1	0	0	0	2	0	0	?	0	0	0	1	?	0	0	?	2	0	0	0	1	1
Dibothrosuchus_elaphros	0	0	0	0	?	0	2	0	0	0	0	?	?	?	0	0	0	?	1	?	?	?	?	0	0	0	?	?	?	?	0	2	0	0	0	0	0	3	1	?	0	0	1	?	?	0	0	1	1
Terrestrisuchus_gracilis	0	0	0	0	?	0	2	?	0	0	0	2	?	?	0	?	0	?	?	?	?	?	?	0	0	0	?	?	?	?	?	?	0	0	?	?	?	?	?	?	0	?	1	?	?	0	0	1	1
Junggarsuchus_sloani	0	0	0	0	?	0	2	0	0	0	0	2	1	0	0	0	0	1	1	0	0	0	0	0	0	0	0	1	0	0	0	2	0	0	?	0	0	0	1	0	0	0	1	2	0	0	0	1	1
Eopneumatosuchus_colberti	1	?	?	?	?	?	?	?	0	0	?	0	0	2	?	?	?	?	?	?	?	?	?	?	?	?	?	?	?	?	?	?	?	?	?	?	?	?	?	?	?	?	?	?	?	?	?	?	?
Hemiprotosuchus_leali	0	0	0	0	?	0	2	0	0	0	?	?	0	2	?	1	0	?	?	0	?	0	0	0	0	?	?	1	?	0	0	2	0	?	?	0	0	?	1	?	0	0	1	2	1	0	0	?	1
Protosuchus_richardsoni	0	0	0	0	?	0	2	0	0	1	1	0	0	2	1	1	0	1	1	0	0	0	0	0	0	0	?	1	0	0	0	2	0	0	?	0	0	0	1	?	0	0	1	2	1	0	0	1	1
Protosuchus_haughtoni	0	0	0	0	?	0	2	0	0	1	1	0	0	2	1	1	0	1	1	0	0	0	0	0	0	0	?	1	0	0	0	2	0	0	?	0	0	0	1	?	0	0	1	2	1	0	0	1	1
Fruitachampsa_callisoni	1	0	?	?	?	0	0	0	0	0	1	0	0	2	1	?	0	?	?	0	?	0	0	0	0	?	?	1	0	0	0	2	?	?	?	?	?	?	?	?	0	0	?	2	1	0	0	1	1
Mariliasuchus_amarali	1	4	0	0	?	0	2	?	0	0	2	0	0	?	0	0	0	1	1	0	0	0	0	0	5	?	?	0	0	0	?	0	?	?	?	?	?	0	1	?	0	1	1	0	1	0	0	1	0
Notosuchus_terrestris	1	4	0	0	?	0	2	?	0	0	2	0	0	2	0	0	0	1	1	0	0	0	0	0	5	?	0	0	0	0	?	0	?	?	?	?	?	0	1	?	0	1	1	0	1	0	0	1	0
Adamantinasuchus_navae	0	?	?	?	?	0	2	?	0	0	2	0	0	?	?	?	0	1	1	0	0	0	0	0	5	?	?	1	0	0	?	0	?	?	?	0	0	0	1	?	0	1	1	0	1	0	0	1	0
Sphagesaurus_huenei	0	{04}	0	0	?	0	2	?	0	0	2	0	0	?	0	?	0	1	1	0	0	?	0	0	5	?	?	1	0	0	?	0	?	?	?	0	0	0	1	?	0	1	1	0	1	0	0	1	0
Caipirasuchus_montealtensis	0	{04}	0	0	?	0	2	?	0	0	2	0	0	?	1	0	0	1	1	0	0	0	0	0	5	?	?	1	0	0	?	0	?	?	?	0	0	0	1	?	0	1	1	0	1	0	0	1	0
Baurusuchus_pachecoi	0	4	0	0	?	0	2	0	0	0	2	0	0	?	1	0	0	1	1	0	0	0	0	0	5	0	0	0	0	0	0	2	0	0	?	0	0	0	1	?	0	0	2	2	1	0	0	1	0
Araripesuchus_patagonicus	1	0	0	0	?	0	2	0	0	0	1	0	0	2	0	0	0	?	?	?	0	0	?	0	?	?	?	?	?	0	?	1	?	?	?	?	?	?	?	?	?	0	0	?	1	?	?	?	1
Montealtosuchus_arrudacamposi	0	0	0	0	?	0	2	0	0	0	1	0	0	2	0	0	?	1	0	0	0	0	0	0	5	0	0	1	0	0	0	2	0	0	0	0	0	0	1	?	0	0	2	2	1	0	0	1	1
Uberabasuchus_terrificus	0	4	0	0	?	0	2	0	0	0	1	0	0	?	0	0	0	1	0	0	0	0	0	0	5	0	0	1	?	0	0	2	0	0	?	0	0	0	1	?	0	0	2	2	1	0	0	1	1
cf_Hamadasuchus_rebouli	0	5	0	0	?	0	2	0	0	0	1	0	0	2	0	0	0	0	0	0	0	0	0	0	0	0	0	1	0	0	0	2	0	0	0	0	0	0	1	?	0	0	2	2	1	0	0	1	1
Sebecus_icaeorhinus	0	5	0	0	?	?	2	0	0	0	1	0	0	?	0	?	0	0	0	0	0	0	0	?	0	?	?	1	?	?	?	2	?	?	?	?	?	0	?	?	0	0	2	2	1	0	0	?	1
Mahajangasuchus_insignis	1	?	?	0	?	?	0	0	0	0	1	0	0	2	0	0	?	?	1	0	0	0	?	?	0	?	?	1	0	0	?	?	?	?	0	?	?	?	?	?	?	0	1	?	?	?	?	?	?
Alligatorium_meyeri	?	?	?	?	?	0	0	0	0	0	1	0	0	2	?	?	1	1	1	0	0	0	0	1	0	0	0	1	0	0	?	2	0	0	?	0	0	?	1	?	0	0	2	2	1	0	?	1	1
Theriosuchus_pusillus	1	{12}	?	1	?	0	0	0	0	0	1	0	0	2	0	0	1	?	1	0	0	0	0	1	0	0	0	1	0	0	?	2	0	0	?	0	0	2	1	?	0	0	2	2	1	0	0	1	1
Eutretauranosuchus_delfsi	1	1	0	1	?	0	0	0	0	0	1	0	0	2	0	0	1	?	1	0	1	0	0	1	0	0	?	?	0	0	?	2	?	?	?	0	0	?	1	?	0	0	2	?	1	0	1	?	1
Amphicotylus_stovalli	1	2	1	1	?	0	0	0	0	0	1	0	0	2	0	0	1	?	?	0	1	?	1	1	0	0	0	1	1	0	?	2	?	0	1	1	?	?	1	?	0	0	2	?	1	0	1	?	1
Goniopholis_baryglphaeus	1	?	?	?	?	0	0	0	0	0	1	0	0	2	0	0	1	?	1	0	1	0	?	1	?	0	?	1	1	0	?	2	0	0	?	?	?	0	1	?	0	0	2	?	1	0	1	?	1
Goniopholis_kiplingi	1	2	1	1	?	0	0	0	0	0	1	0	0	2	0	?	1	1	1	0	1	?	1	1	0	0	0	1	1	0	0	2	?	0	?	1	0	0	1	?	0	0	2	2	1	0	1	1	1
Goniopholis_simus	1	2	1	1	?	0	0	0	0	0	1	0	0	2	0	0	1	1	1	0	1	0	1	1	0	0	?	1	1	0	0	2	0	0	?	?	0	0	1	?	0	0	2	2	1	0	1	0	1
Anteophthalmosuchus_hooleyi	1	2	1	1	?	0	0	0	0	0	1	0	0	2	0	0	1	?	1	0	1	0	?	?	?	?	?	?	?	?	?	2	?	?	?	?	?	?	1	?	?	0	?	?	?	0	1	?	1
Anteophthalmosuchus_epikrator	1	2	1	1	?	0	0	0	0	0	1	0	0	2	0	?	1	1	1	0	1	0	1	1	0	0	0	1	1	0	0	2	0	0	1	1	0	?	1	?	0	0	2	2	1	0	1	1	1
Elosuchus_cherifiensis	1	2	1	1	?	1	1	0	0	0	3	0	0	2	0	0	1	1	?	0	0	?	0	1	0	?	0	?	0	0	0	2	0	0	2	2	0	?	1	?	0	0	1	2	?	?	?	1	1
Elosuchus_broinae	1	2	1	1	?	1	1	0	0	0	3	0	0	2	0	0	1	1	?	0	0	?	0	1	0	0	0	1	0	0	0	2	0	0	2	2	0	0	1	?	0	0	1	2	1	0	1	1	1
Vectisuchus_leptognathus	1	{12}	?	1	?	0	1	0	0	0	3	0	0	2	?	0	1	?	1	0	0	-	0	1	0	?	?	1	?	0	?	?	?	?	?	?	?	?	?	?	0	0	1	?	?	0	1	?	1
Pholidosaurus_schaumburgensis	1	0	1	1	?	1	1	0	0	0	1	0	0	2	0	0	1	?	?	0	0	-	?	?	?	?	?	?	?	?	?	?	0	?	?	?	?	?	?	?	?	0	?	?	?	?	?	?	1
Pholidosaurus_sp_(Charente)	1	2	1	1	2	1	1	0	0	0	3	0	0	2	0	0	1	?	?	?	0	-	0	1	0	0	0	1	0	0	0	2	0	0	1	1	0	0	1	1	0	0	1	2	1	0	1	0	1
Meridiosaurus_vallisparadisi	?	?	?	?	?	2	1	0	0	?	3	?	?	?	0	?	1	1	1	?	?	?	0	1	0	0	0	1	0	0	1	2	0	0	1	1	0	1	1	1	0	0	1	2	1	2	1	-	?
Chalawan_thailandicus	1	?	?	?	?	1	0	0	1	0	?	?	0	2	0	?	1	?	?	?	?	?	0	1	?	?	?	1	0	?	1	2	0	0	?	2	0	1	1	?	0	0	?	?	?	0	?	0	1
Sarcosuchus_hartti	?	?	?	?	?	?	?	?	1	?	?	?	?	?	?	?	1	?	?	?	?	0	?	?	?	?	?	?	?	?	?	?	0	?	?	?	?	?	?	?	?	?	?	?	?	?	?	?	?
Sarcosuchus_imperator	1	2	1	1	?	1	0	0	1	0	1	0	0	2	0	0	1	?	?	0	0	0	0	1	0	0	0	1	0	0	1	2	0	0	1	2	0	1	1	?	0	0	1	2	1	0	1	0	1
cf_Terminonaris_robusta	1	?	?	0	?	1	1	0	0	0	1	0	0	2	?	0	1	?	1	?	0	-	0	1	0	0	0	1	0	?	1	2	0	1	1	2	0	1	1	?	?	0	1	2	1	0	1	0	1
Oceanosuchus_boecensis	1	?	1	?	?	1	1	0	0	?	1	0	0	2	?	?	1	?	1	0	0	0	0	1	0	0	0	1	0	?	1	2	0	0	1	2	0	0	1	?	0	0	?	2	1	0	1	0	1
Pholidosaurus_purbeckensis	1	1	1	1	?	1	1	0	0	0	3	0	0	1	0	0	1	?	?	?	0	-	?	?	?	?	?	?	?	?	?	?	?	?	?	?	?	?	?	?	?	?	?	?	?	?	?	?	1
Fortignathus_felixi	?	?	?	?	?	{1,2}	?	?	0	?	?	?	?	?	?	?	1	?	?	?	?	0	?	?	?	?	?	?	?	?	?	?	?	?	?	?	?	?	?	?	?	?	?	?	?	?	?	?	?
Acherontisuchus_guajiraensis	?	?	?	?	?	1	1	?	0	?	0	?	?	?	?	?	1	?	?	?	?	0	?	?	?	?	?	?	?	?	?	?	?	?	?	?	?	?	?	?	?	?	?	?	?	?	?	?	?
Anthracosuchus_balrogus	1	?	?	0	2	0	0	0	0	0	0	0	0	2	0	0	1	?	?	0	?	?	0	1	1	1	1	1	0	0	0	2	1	0	1	1	0	2	1	0	0	0	2	2	1	0	1	1	1
Arambourgisuchus_khouribgaensis	1	?	?	0	?	1	1	0	0	0	1	2	1	0	0	?	1	0	0	?	0	-	0	1	0	?	?	1	0	?	0	2	0	1	?	0	0	0	1	?	0	0	?	2	1	0	1	0	1
Atlantosuchus_coupatezi	1	?	?	0	?	1	1	0	0	0	1	0	1	1	?	?	1	?	?	0	0	-	0	1	?	?	?	1	0	?	?	?	?	1	?	?	?	0	1	?	0	0	?	2	1	0	1	0	1
Cerrejonisuchus_improcerus	1	?	1	0	?	0	1	0	0	0	0	0	0	2	0	?	1	0	0	0	0	0	0	1	0	2	1	1	0	0	0	2	1	0	1	1	0	1	1	?	0	0	?	2	1	0	1	1	1
Chenanisuchus_lateroculi	1	?	1	0	?	0	1	0	0	0	1	0	0	2	?	?	1	?	?	0	0	?	0	1	0	?	1	1	0	0	0	2	1	0	?	?	?	1	1	?	0	0	?	2	1	0	1	1	1
Congosaurus_bequaerti	1	?	?	?	?	1	1	0	0	0	2	2	?	?	0	?	1	0	0	0	0	-	0	1	0	1	0	1	0	0	0	2	0	1	1	1	0	1	1	0	0	0	1	2	1	0	1	0	1
Dyrosaurus_maghribensis	1	5	1	0	?	1	1	0	0	0	1	0	0	1	0	0	1	0	0	0	0	-	0	1	0	?	?	1	0	0	0	2	0	1	?	0	0	0	1	?	0	0	?	2	1	0	1	0	1
Dyrosaurus_phosphaticus	1	?	?	0	?	1	1	0	0	0	1	0	0	2	0	?	1	0	0	0	0	-	0	1	0	1	0	1	0	0	0	2	0	1	?	0	0	1	1	?	0	0	?	2	1	0	1	0	1
Guarinisuchus_munizi	1	5	1	0	?	1	1	0	0	0	0	0	1	1	0	0	1	0	0	0	0	-	?	1	0	1	0	1	0	0	0	2	0	1	?	0	0	?	?	?	0	0	?	2	1	0	1	0	1
Hyposaurus_rogersii	1	5	1	0	1	1	1	0	0	0	1	0	1	2	?	?	1	?	?	0	0	?	0	1	0	?	0	1	0	?	0	2	0	1	?	1	0	0	1	?	0	0	1	2	1	1	1	0	1
Phosphatosaurus_gavialoides	?	?	?	?	1	1	0	0	0	0	?	?	1	2	?	?	?	?	?	?	?	?	0	1	0	1	1	1	0	?	0	?	1	0	1	1	0	1	1	0	0	0	1	2	1	0	1	1	1
Rhabdognathus_keiniensis	1	?	?	0	2	1	1	0	0	0	0	0	1	1	?	?	?	?	?	0	?	?	?	?	?	?	?	?	?	?	?	?	?	?	?	?	?	?	?	?	?	?	?	?	?	0	?	?	1
Rhabdognathus_aslerensis	1	5	1	0	?	?	1	0	0	0	0	0	1	1	0	0	?	?	?	0	0	?	?	?	?	?	?	?	?	?	?	?	?	?	?	?	?	?	?	?	?	?	?	?	?	?	?	?	1
Sabinosuchus_coahuilensis	?	?	?	?	0	1	?	0	0	0	0	2	?	?	?	?	?	?	?	?	?	?	?	?	?	?	?	?	?	?	?	?	?	?	?	?	?	?	?	?	?	0	?	?	?	?	?	?	1
Sokotosuchus_ianwilsoni	?	?	?	?	2	1	0	0	0	0	1	1	1	2	0	?	?	?	?	?	?	?	?	1	0	1	1	1	0	?	0	?	1	0	1	1	0	1	?	?	0	0	1	2	1	0	1	1	?
Bernissartia_fagesii	1	1	0	1	?	0	0	0	0	0	1	?	0	2	0	0	1	?	?	0	0	?	0	0	0	?	0	1	0	0	0	2	?	0	?	0	0	?	1	?	0	0	2	2	1	0	0	1	1
Koumpiodontosuchus_aprosdokiti	1	1	0	?	?	0	0	0	0	0	1	1	0	2	0	0	1	1	1	0	0	?	0	0	0	?	?	1	0	?	?	2	?	?	?	0	0	0	1	0	0	0	?	?	1	0	1	?	1
Susisuchus_anatoceps	1	1	0	1	?	0	0	0	0	0	1	0	0	2	?	?	1	?	1	0	0	-	0	1	4	?	?	1	0	0	?	2	?	?	?	?	?	1	1	?	0	0	1	2	1	0	1	?	1
Isisfordia_duncani	1	1	0	1	?	0	0	0	0	0	1	0	0	2	0	0	?	?	?	0	?	-	0	1	4	0	?	1	0	0	0	2	?	?	0	0	0	1	1	?	0	0	1	2	1	0	1	?	1
Pietraroiasuchus_ormezzanoi	1	?	?	1	?	0	0	0	0	0	?	?	0	2	0	0	1	?	?	0	?	?	0	1	?	0	0	1	0	0	1	2	0	0	?	0	0	2	1	?	0	0	1	2	1	0	1	1	1
Pachycheilosuchus_trinquei	?	?	?	?	?	?	?	?	?	?	?	?	?	?	0	?	?	?	?	?	?	?	?	?	?	?	?	?	?	?	?	?	?	?	?	?	?	?	?	?	?	?	?	?	?	?	?	?	?
Iharkutosuchus_makadii	1	?	?	1	2	0	0	0	0	0	1	0	0	2	0	0	?	?	?	?	0	?	0	0	0	0	0	1	0	0	1	2	0	0	0	0	0	2	1	?	0	0	1	2	1	0	0	-	1
Gavialis_gangeticus	1	1	0	1	?	1	1	0	0	1	1	0	0	2	0	0	1	0	0	0	0	-	0	1	0	0	0	1	0	0	1	2	0	0	?	0	0	0	1	?	0	0	1	2	1	2	1	1	1
Crocodylus_porosus	1	1	0	1	2	0	0	0	0	0	1	0	0	2	0	0	1	0	0	0	0	1	0	1	0	0	0	1	0	0	1	2	0	0	?	0	0	2	1	?	0	0	2	2	1	0	1	1	1
Crocodylus_niloticus	1	1	0	1	2	0	0	0	0	0	1	0	0	2	0	0	1	0	0	0	0	1	0	1	0	0	0	1	0	0	1	2	0	0	?	0	0	2	1	?	0	0	2	2	1	0	1	1	1
Alligator_mississippiensis	1	1	0	1	2	0	0	0	0	0	1	0	0	2	0	0	1	0	0	0	0	1	0	1	0	0	0	1	0	0	1	2	0	0	0	0	0	2	1	?	0	0	1	2	1	?	0	1	1
Steneosaurus_gracilirostris	1	0	0	0	0	2	1	0	0	0	3	0	0	2	?	?	1	1	1	0	0	-	0	1	1	0	0	1	0	1	0	2	0	0	?	0	0	1	1	0	0	0	?	2	1	2	1	-	0
Steneosaurus_brevior	1	?	0	0	1	0	1	0	0	0	3	0	0	2	?	?	1	1	1	0	0	-	0	0	1	0	0	1	0	1	0	2	0	0	?	0	1	1	1	?	0	0	1	2	1	2	1	-	0
Chinese_teleosaurid	1	?	?	?	?	0	1	0	0	0	?	0	0	2	0	0	?	1	1	0	0	-	0	0	1	0	0	1	0	1	?	2	0	0	0	?	1	0	1	?	0	0	1	2	1	2	1	-	0
Platysuchus_multiscrobiculatus	1	5	0	0	1	2	1	0	0	0	3	0	0	2	?	0	1	1	1	0	0	-	0	0	1	0	0	1	0	1	0	2	0	0	?	?	1	1	1	?	0	0	?	2	1	2	1	-	0
Teleosaurus_cadomensis	1	5	0	0	?	2	1	0	0	1	3	0	0	2	0	0	?	?	?	0	0	-	?	0	1	0	0	1	?	?	?	?	0	?	?	?	?	1	1	?	0	0	1	2	1	2	1	-	0
Mycterosuchus_nasutus	1	?	?	0	0	2	1	0	0	1	3	0	0	2	0	0	1	1	1	0	0	-	?	?	1	0	0	1	0	1	0	2	0	0	0	0	1	1	1	?	?	0	1	2	1	2	1	-	0
Teleosaurus_megarhinus	?	?	?	?	?	2	1	0	0	1	0	?	?	?	?	?	?	1	1	?	?	-	0	0	1	0	?	1	0	1	0	2	0	0	0	0	1	?	1	?	0	0	1	2	1	2	1	?	0
Steneosaurus_bollensis	1	0	0	0	{0,1}	2	1	0	0	0	3	0	0	2	0	0	1	1	1	0	0	-	?	1	1	0	?	1	0	1	0	2	0	0	0	0	0	1	1	0	0	0	1	2	1	2	1	-	0
Steneosaurus_leedsi	1	3	1	0	0	2	1	0	0	0	3	0	0	2	0	0	1	1	1	0	0	-	0	1	1	0	0	1	0	1	0	2	0	0	0	0	0	1	1	0	0	0	1	2	1	2	1	-	0
Aeolodon_priscus	?	?	?	?	0	2	1	0	0	1	0	0	1	?	?	?	?	?	?	?	0	-	?	?	1	0	0	?	0	?	?	2	0	0	?	?	?	1	1	?	0	0	?	2	?	?	1	-	?
Steneosaurus_larteti	1	?	?	?	1	2	?	?	0	0	?	0	0	?	0	0	1	1	1	0	?	-	0	1	1	0	0	?	0	?	0	2	0	0	0	0	0	?	1	?	?	0	?	2	1	?	1	-	?
Steneosaurus_heberti	1	3	1	0	1	2	?	?	0	0	?	0	0	2	0	0	1	1	1	0	0	-	0	1	1	0	0	?	0	1	0	2	0	0	0	0	0	?	1	?	?	0	?	2	1	?	1	-	?
Steneosaurus_edwardsi	1	3	1	0	1	0	1	0	0	0	?	0	0	2	0	0	1	1	1	0	0	-	0	1	1	0	0	1	0	1	0	2	0	0	0	0	0	1	1	0	0	0	1	2	1	2	1	-	0
Lemmysuchus_obtusidens	1	3	1	0	1	0	1	0	0	0	?	0	0	?	0	0	1	1	1	0	0	-	0	1	1	0	0	?	0	1	0	2	0	0	0	0	0	?	1	0	?	0	?	2	1	?	1	-	?
Machimosaurus_buffetauti	1	3	1	0	{1,2}	0	0	0	0	0	3	?	0	2	0	0	1	1	1	0	0	0	0	1	1	0	0	1	0	1	0	2	0	0	?	0	0	?	1	0	?	0	?	2	1	2	1	-	0
Machimosaurus_mosae	1	?	?	0	2	0	0	0	0	0	2	0	0	2	0	0	1	1	1	?	0	0	0	1	1	0	0	1	0	1	0	2	0	0	0	0	0	?	1	0	?	0	?	2	1	2	1	-	0
Machimosaurus_hugii	?	?	?	?	?	0	0	0	0	0	2	?	?	?	?	?	1	?	?	?	0	?	?	?	?	?	?	?	?	?	?	?	?	?	?	?	?	?	?	?	?	0	?	2	?	?	1	-	0
Machimosaurus_rex	?	?	?	?	?	0	0	0	0	0	2	?	?	?	?	?	1	?	?	?	0	?	?	?	?	?	?	?	?	?	?	?	?	?	?	?	?	?	?	?	?	?	?	?	?	?	1	-	0
Pelagosaurus_typus	1	2	1	0	0	2	1	0	0	0	3	0	0	2	0	0	1	1	1	0	0	-	0	1	0	0	0	1	0	1	?	2	0	0	?	0	0	0	1	?	0	0	1	2	1	2	1	-	0
Magyarosuchus_fitosi	?	?	?	?	?	?	?	?	?	?	?	?	?	?	?	?	?	?	?	?	?	?	?	?	?	?	?	?	?	?	?	?	?	?	?	?	?	?	?	?	?	?	?	?	?	?	?	?	?
Teleidosaurus_calvadosii	1	3	1	0	?	0	1	0	0	0	3	0	0	2	?	?	?	1	1	0	0	-	0	1	2	0	0	1	0	1	0	2	0	0	?	0	0	1	1	0	0	0	1	2	1	2	1	-	0
Peipehsuchus_teleorhinus	?	?	?	?	?	?	1	0	0	?	3	?	?	?	?	?	?	1	1	?	?	?	0	1	2	0	0	1	?	1	0	2	0	0	?	0	0	1	1	0	0	0	?	2	1	2	?	-	?
Eoneustes_bathonicus	?	?	?	?	?	?	1	0	0	0	3	0	?	?	?	?	?	?	?	?	0	?	?	?	?	?	?	?	?	?	?	?	?	?	?	?	?	?	?	?	?	?	1	?	?	2	?	?	0
Eoneustes_gaudryi	?	?	?	?	?	?	1	0	0	0	3	0	?	?	0	?	?	?	?	0	0	?	?	?	?	?	?	?	?	?	?	?	?	?	?	?	?	?	?	?	?	?	1	?	?	?	?	?	0
Chile_metriorhynchoid	?	?	?	?	?	?	?	?	?	?	?	0	?	?	?	?	?	?	?	?	?	?	?	?	?	?	?	?	?	?	?	?	?	?	?	?	?	?	?	?	?	?	?	?	?	?	?	?	?
Zoneait_nargorum	?	?	?	?	?	?	1	0	?	?	?	0	0	?	?	?	?	?	?	?	0	?	?	?	?	?	?	?	?	?	?	?	?	?	?	?	?	?	?	?	?	?	?	?	?	?	?	?	?
Cricosaurus_elegans	?	?	?	?	?	2	1	0	0	0	2	1	1	0	?	?	1	1	1	0	0	-	0	1	3	0	-	3	0	?	?	2	0	-	?	?	0	3	1	-	1	0	1	2	1	2	1	-	0
Cricosaurus_suevicus	0	3	1	?	?	2	1	0	0	0	0	3	1	0	?	?	1	1	1	0	0	-	0	1	3	0	-	3	0	1	?	2	0	-	?	?	0	3	1	-	1	0	1	2	1	2	1	-	0
Cricosaurus_schroederi	0	3	1	0	?	?	1	0	0	0	0	3	1	0	0	?	1	1	1	0	0	-	0	1	?	?	?	?	?	?	?	?	?	?	?	?	?	?	?	?	?	?	?	?	?	?	?	?	0
Cricosaurus_araucanensis	0	3	1	0	?	2	1	0	0	0	0	3	1	0	0	0	1	1	1	0	0	-	0	1	3	0	-	3	0	1	?	2	0	-	0	0	0	3	1	-	1	0	1	2	1	2	1	-	0
Cricosaurus_vignaudi	?	?	?	?	?	2	1	0	0	0	0	3	1	0	?	?	?	?	?	?	?	-	?	?	?	?	-	3	0	?	?	?	0	-	?	?	?	3	1	-	?	?	1	?	?	2	1	-	0
Cricosaurus_lithographicus	?	?	?	?	?	2	1	0	0	0	0	3	1	0	?	?	?	1	1	?	?	-	0	1	3	0	-	3	0	?	?	2	0	-	?	0	0	3	1	-	1	0	?	2	1	1	1	-	0
Dakosaurus_lissocephalus	?	?	?	0	?	?	?	?	?	?	?	1	1	0	?	?	?	?	?	?	?	?	?	?	?	?	?	?	?	?	?	?	?	?	?	?	?	?	?	?	?	?	?	?	?	?	?	?	0
Cricosaurus_sp_Cuba	1	?	?	?	?	?	?	?	?	?	?	1	?	?	?	?	?	?	?	?	?	?	?	?	?	?	?	?	?	?	?	?	?	?	?	?	?	?	?	?	?	?	?	?	?	?	?	?	0
Rhacheosaurus_gracilis	1	3	1	0	?	2	1	0	0	0	2	?	?	?	?	?	1	?	1	0	0	-	0	1	3	0	-	3	0	?	?	2	0	-	?	?	0	3	1	-	1	0	1	2	1	2	1	-	0
Metriorhynchidae_indet_Cuba	1	?	?	?	?	?	1	0	?	?	?	?	?	?	?	?	?	?	?	?	?	?	?	?	?	?	?	?	?	?	?	?	?	?	?	?	?	?	?	?	?	?	?	?	?	?	?	?	?
Cricosaurus_macrospondylus	?	?	?	?	?	?	1	0	0	?	2	3	1	?	?	?	?	1	1	0	0	-	0	1	3	0	-	3	0	?	?	2	0	-	?	0	0	3	1	-	1	0	1	2	1	0	0	-	0
Cricosaurus_saltillensis	?	?	?	?	?	0	?	0	0	0	2	3	1	?	?	?	?	?	?	0	?	-	0	1	3	0	-	3	0	?	?	2	0	-	?	0	0	?	1	-	1	0	?	2	1	2	1	-	0
Metriorhynchus_palpebrosus	1	3	1	0	?	2	1	0	0	0	2	?	?	1	0	?	?	?	?	0	0	-	0	1	3	0	-	3	0	?	?	2	0	-	0	0	0	?	1	-	1	0	1	2	1	2	1	-	0
Maledictosuchus_riclaensis	1	3	1	?	?	2	1	0	0	0	2	2	?	1	0	?	1	1	1	0	0	-	0	1	3	0	-	2	0	?	?	2	0	-	0	0	0	1	1	0	1	0	1	2	1	2	1	-	0
Gracilineustes_acutus	?	?	?	?	?	2	1	0	0	0	?	3	?	?	?	?	?	?	?	?	?	-	0	1	3	?	0	2	?	?	?	?	0	0	?	0	?	0	1	?	?	?	1	?	?	2	1	-	0
Gracilineustes_leedsi	1	3	1	0	0	2	1	0	0	0	0	3	1	0	0	?	1	1	1	0	0	-	0	1	3	0	0	2	0	1	0	2	0	0	0	0	0	1	1	0	?	0	1	2	1	2	1	-	0
Metriorhynchus_geoffroyii	?	?	?	?	?	?	1	0	0	?	?	?	?	?	?	?	1	1	1	?	0	?	0	1	3	0	0	2	0	1	0	2	0	0	0	0	0	1	1	0	1	0	?	2	1	2	1	-	0
Metriorhynchus_superciliosus	1	3	1	0	1	2	1	0	0	0	3	0	0	1	0	0	1	1	1	0	0	-	0	1	3	0	0	2	0	1	0	2	0	0	0	0	0	1	1	0	1	0	1	2	1	2	1	-	0
Geosaurine_indet_Argentina	?	?	?	?	?	?	?	?	?	?	?	0	?	?	?	?	?	?	?	?	?	?	?	?	?	?	?	?	?	?	?	?	?	?	?	?	?	?	?	?	?	?	?	?	?	?	?	?	?
Metriorhynchus'_casamiquelai	?	?	?	0	1	0	0	0	0	0	0	3	?	?	0	0	?	?	?	0	0	0	0	1	3	?	0	2	0	?	?	2	0	0	?	0	?	2	1	0	?	?	1	?	?	2	1	-	0
Metriorhynchus'_westermanni	?	?	?	?	?	?	?	?	0	0	?	3	?	?	?	?	?	?	?	?	?	?	?	?	?	?	?	?	?	?	?	?	?	?	?	?	?	?	?	?	?	?	?	?	?	?	?	?	?
Neptunidraco_ammoniticus	?	?	?	?	?	?	0	?	?	?	?	?	?	?	?	?	?	?	?	?	?	?	?	?	?	?	?	?	?	?	?	?	?	?	?	?	?	?	?	?	?	?	?	?	?	?	?	?	0
Metriorhynchus_brachyrhynchus	1	3	1	0	{1,2}	0	0	0	0	0	3	0	0	1	0	0	1	1	1	0	0	0	0	1	3	0	0	2	0	1	0	2	0	0	0	0	0	1	1	0	1	0	1	2	1	{0,1}	1	-	0
Tyrannoneustes_lythrodectikos	1	3	1	0	?	0	0	0	0	0	3	0	0	1	0	?	1	1	1	0	0	-	0	1	3	0	0	2	0	1	?	2	0	0	0	?	0	?	1	1	?	?	1	?	1	1	1	-	0
Metriorhynchus_hastifer	?	?	?	?	?	0	0	0	0	0	?	0	?	1	?	?	?	?	?	?	0	?	0	1	?	?	0	?	?	1	?	?	0	0	?	?	?	?	1	1	?	0	1	2	?	1	1	-	0
Mr_Passmores_Specimen	?	?	?	0	?	0	0	0	0	0	3	0	?	?	?	?	?	?	?	?	0	?	0	1	3	0	0	2	0	?	0	?	0	0	?	0	?	1	1	1	1	0	1	2	?	1	1	-	0
cf_Torvoneustes_(MANCH_J6459)	?	?	?	?	?	?	0	0	0	?	2	2	?	?	?	?	?	?	?	?	?	?	?	?	?	?	?	?	?	?	?	?	?	?	?	?	?	?	?	?	?	?	?	?	?	?	1	?	0
Torvoneustes_coryphaeus	1	3	1	0	?	?	?	?	?	0	2	2	1	0	0	?	?	?	?	0	0	?	?	?	?	?	?	?	?	?	?	?	?	?	?	?	?	?	?	?	?	?	?	?	?	?	?	?	0
Torvoneustes_carpenteri	?	?	?	?	?	0	0	0	0	0	2	3	1	0	0	?	?	?	?	0	0	?	?	?	3	0	0	2	0	1	0	?	0	0	?	0	?	1	1	1	?	?	1	?	1	1	1	?	0
Torvoneustes_mexicanus	?	?	?	?	?	?	?	?	?	?	?	?	?	?	?	?	?	?	?	?	?	?	?	?	?	?	?	?	?	?	?	?	?	?	?	?	?	?	?	?	?	?	?	?	?	?	?	?	?
Torvoneustes_sp_(SEC_K1707)	?	?	?	?	?	?	?	?	?	?	?	?	?	?	?	?	?	?	?	?	?	?	?	?	?	?	?	?	?	?	?	?	?	?	?	?	?	?	?	?	?	?	?	?	?	?	?	?	?
Purranisaurus_potens	1	3	1	0	?	?	?	0	0	0	?	?	?	?	0	0	?	?	?	0	0	?	?	?	?	?	?	?	?	?	?	?	?	?	?	?	?	?	?	?	?	?	?	?	?	?	?	?	0
Ieldraan_melkshamensis	?	?	?	?	?	?	?	?	0	?	1	0	?	?	?	?	?	?	?	?	0	0	?	?	?	?	?	?	?	?	?	?	?	?	?	?	?	?	?	?	?	?	?	?	?	?	?	-	?
Geosaurus_giganteus	?	?	?	?	?	0	?	?	0	?	1	3	?	?	?	0	1	1	1	0	0	0	?	?	3	0	0	2	0	?	?	?	?	0	?	?	?	2	1	0	?	?	2	?	?	1	1	-	0
Geosaurus_grandis	?	3	1	0	?	0	0	0	0	0	1	3	1	?	0	?	1	1	1	0	0	0	0	1	3	0	0	2	0	?	0	2	?	0	?	0	0	2	1	0	?	0	1	2	?	1	1	-	0
Geosaurus_lapparenti	?	?	?	?	?	?	?	?	?	?	?	3	?	?	?	?	?	?	?	?	?	?	?	?	?	?	?	?	?	?	?	?	?	?	?	?	?	?	?	?	?	?	?	?	?	?	?	?	?
Suchodus_durobrivensis	1	3	1	0	?	0	0	0	0	0	2	0	0	1	0	?	1	?	?	?	0	0	?	?	3	0	?	2	0	?	?	?	?	?	?	?	?	?	?	0	?	?	1	?	1	1	1	?	0
Plesiosuchus_manselii	1	3	1	0	?	0	0	0	0	0	2	1	?	?	0	?	1	?	?	0	0	0	0	1	3	0	0	2	0	1	0	2	0	0	0	0	0	2	1	0	?	0	1	2	1	2	1	-	0
Dakosaurus_andiniensis	0	3	1	0	?	0	2	1	0	0	0	3	1	?	0	0	1	1	1	0	0	0	0	1	3	0	0	3	0	?	?	2	?	?	?	0	0	2	1	0	?	0	1	2	1	1	1	-	0
Dakosaurus_maximus	?	3	1	?	?	0	0	1	0	0	3	1	1	?	0	?	1	1	1	0	0	0	0	1	3	0	0	3	0	1	0	2	?	?	?	0	0	2	1	0	?	0	1	2	1	1	1	-	0
Mr_Leeds_Dakosaur	1	3	1	0	?	0	0	1	0	0	3	0	0	1	0	?	1	1	1	0	0	0	0	1	3	0	0	?	?	?	0	2	0	0	?	0	0	2	1	0	?	0	?	2	1	1	1	-	0
Vaches_Noire_Dakosaur	?	?	?	?	?	?	?	1	0	0	3	0	?	?	?	?	?	?	?	0	0	?	?	?	?	?	?	?	?	?	?	?	?	?	?	?	?	?	?	?	?	?	?	?	?	?	?	?	0
[truncated: 405 more columns]

## Sheet: W dataset
Taxon	1	2	3	4	5	6	7	8	9	10	11	12	13	14	15	16	17	18	19	20	21	22	23	24	25	26	27	28	29	30	31	32	33	34	35	36	37	38	39	40	41	42	43	44	45	46	47	48	49
Gracilisuchus_stipanicicorum	0	0	0	0	0	0	0	1	0	0	1	0	0	0	1	0	?	0	0	0	0	0	0	0	0	0	0	-	1	0	1	0	0	0	-	0	1	0	0	0	0	0	0	0	0	0	0	0	0
Postosuchus_kirkpatricki	0	0	0	0	1	1	0	?	0	0	1	0	0	0	1	0	?	0	2	0	0	?	-	0	0	0	0	-	0	0	1	0	0	0	-	0	1	1	1	0	0	0	?	?	?	0	0	1	0
Hesperosuchus_cf_gracilis	0	0	0	0	?	0	0	1	0	0	0	?	0	0	0	0	?	0	?	0	0	0	?	0	0	1	1	-	0	0	?	1	-	1	0	0	0	0	1	0	0	0	0	0	0	0	0	0	0
Dibothrosuchus_elaphros	0	0	0	0	0	0	0	1	0	0	1	?	0	0	1	0	0	0	2	0	0	?	1	0	0	0	1	-	0	0	1	1	-	1	0	0	0	0	1	0	0	0	?	0	?	0	0	0	0
Sphenosuchus_acutus	0	0	0	0	0	0	0	1	0	0	1	?	0	0	1	0	0	0	?	0	0	0	?	0	0	0	1	-	0	0	0	1	-	0	0	0	0	0	1	0	0	0	0	0	0	0	0	0	0
Junggarsuchus_sloani	0	0	0	0	0	0	0	1	2	0	0	-	0	0	1	0	?	?	0	0	0	0	1	0	0	1	1	-	0	0	1	0	0	1	0	0	0	0	0	0	?	0	0	0	0	0	0	0	1
Almadasuchus_figarii	?	?	?	?	?	?	?	?	?	0	?	?	?	0	?	?	?	?	?	?	?	?	?	?	?	?	?	-	?	?	?	?	?	?	?	?	?	?	?	?	?	?	?	?	?	?	?	0	?
Kayentasuchus_walkeri	0	?	?	0	0	0	0	1	?	0	?	?	?	0	1	0	?	0	2	0	0	0	1	0	1	?	1	-	?	0	?	0	?	?	?	0	0	0	?	0	?	0	0	?	?	?	0	?	?
Protosuchus_richardsoni	1	1	1	0	0	0	0	0	0	0	1	0	0	1	0	0	0	?	2	0	0	0	1	0	0	1	1	-	0	0	0	1	-	0	-	0	0	0	0	0	0	0	0	0	0	0	0	0	0
Orthosuchus_stormbergi	1	1	1	0	0	0	0	0	0	0	1	0	0	1	0	0	0	0	2	0	0	0	0	0	0	1	1	-	0	0	0	1	-	1	0	0	0	0	0	0	0	0	0	0	?	0	0	0	?
Edentosuchus_tienshanensis	1	1	1	0	0	?	?	?	?	?	?	?	0	1	?	0	?	0	?	0	0	0	1	0	0	3	?	-	-	0	0	?	?	?	0	0	0	0	?	-	-	0	0	0	?	?	?	0	?
Kayenta_Form	1	1	1	0	-	0	0	?	0	?	1	?	?	1	0	0	0	?	2	0	0	0	1	0	0	3	1	-	-	0	0	0	0	?	?	?	?	0	?	-	-	0	?	?	?	?	?	?	?
Gobiosuchus_kielanae	1	0	1	0	0	0	0	0	0	0	1	0	0	1	0	0	0	0	1	0	0	?	0	0	0	1	1	-	0	0	1	0	0	?	0	0	0	0	0	0	0	0	?	0	?	0	0	0	0
Sichuanosuchus_shuhanensis	1	1	1	0	0	?	0	?	0	0	1	?	0	1	0	0	?	0	2	0	0	0	1	0	0	2	1	-	0	0	?	0	?	1	0	0	0	0	0	1	0	0	?	0	?	0	0	0	1
Shantungosuchus_hangjinensis	?	1	1	0	?	?	0	?	0	0	?	?	0	1	?	?	0	0	?	0	0	?	?	0	0	?	?	-	?	0	?	0	?	?	?	?	?	?	?	?	?	?	?	?	?	?	?	?	?
Zosuchus_davidsoni	1	0	1	0	0	0	0	?	2	0	?	-	0	1	0	0	0	0	2	0	0	0	0	0	0	2	1	-	0	0	1	0	0	0	-	0	0	0	0	1	1	0	0	0	?	?	0	0	1
Zaraasuchus_shepardi	?	0	?	?	?	?	?	?	?	?	?	?	?	?	?	?	?	?	?	?	?	0	?	?	?	?	?	-	?	?	?	?	?	?	?	?	?	?	?	?	?	?	?	?	?	?	?	?	?
Fruitachampsa_callisoni	1	0	1	0	0	0	0	?	?	?	?	?	?	1	0	0	?	1	2	0	0	0	0	0	0	3	-	-	-	0	0	0	1	?	0	0	0	0	0	-	-	0	0	0	0	?	0	0	1
Hsisosuchus_chungkingensis	?	0	0	0	?	?	?	?	?	?	?	?	?	1	?	?	?	?	?	0	0	0	0	0	1	1	1	-	0	0	?	?	?	1	0	0	0	0	1	?	0	0	?	0	0	0	0	0	1
Hsisosuchus_dashanpuensis	1	0	0	1	1	0	0	0	0	0	1	0	0	1	0	0	3	0	?	1	1	0	?	?	1	1	1	-	0	0	0	0	0	1	0	0	0	0	1	0	0	0	0	0	0	0	0	0	1
Simosuchus_clarki	1	0	1	0	0	0	0	?	0	1	1	0	0	1	1	0	2	1	0	0	0	0	1	?	0	1	0	-	0	0	1	0	0	0	-	0	0	0	0	1	0	0	0	0	0	0	0	0	1
Libycosuchus_brevirostris	?	0	1	0	0	?	0	0	0	?	1	?	0	1	?	?	?	?	0	0	0	0	1	0	0	?	?	-	?	?	?	?	?	?	?	?	?	?	0	?	?	?	0	?	?	0	?	?	?
Araripesuchus_patagonicus	1	0	1	?	1	?	?	?	?	1	?	?	?	?	?	?	?	?	0	?	0	0	1	?	0	1	1	-	0	?	0	0	0	0	-	0	?	0	0	1	0	0	0	0	0	0	0	0	1
Araripesuchus_gomesii	1	0	1	0	1	0	0	?	0	0	1	?	0	1	1	0	?	1	0	1	0	0	1	0	0	1	1	-	0	0	0	0	0	0	-	0	0	0	0	1	0	0	0	0	0	0	0	0	1
Malawisuchus_mwakasyungutiensis	1	0	1	0	0	0	0	?	0	?	?	?	0	1	1	0	?	1	1	0	0	0	1	0	0	2	1	-	0	0	1	0	0	0	-	0	0	0	0	1	0	0	0	0	?	0	0	0	2
Uruguaysuchus_aznarezi	?	0	1	0	0	0	0	?	?	?	0	?	0	1	1	0	?	1	0	0	0	0	1	0	0	2	1	-	?	0	1	?	?	?	0	0	0	0	?	?	0	0	0	?	?	?	?	0	2
Notosuchus_terrestris	1	0	1	0	0	0	0	?	2	?	0	-	0	1	1	0	?	1	0	0	0	0	1	0	0	2	1	-	0	0	0	0	1	1	0	0	0	0	0	1	0	0	0	0	0	0	0	0	1
Mariliasuchus_amarali	1	0	1	0	0	0	0	?	2	1	?	-	0	1	?	?	?	?	0	0	0	0	1	?	0	3	?	-	?	?	0	0	0	0	-	0	0	0	0	?	?	0	0	?	0	0	0	0	1
Comahuesuchus_brachybuccalis	1	0	1	0	0	0	0	?	2	1	0	-	0	1	1	0	2	0	0	0	0	0	1	1	0	3	?	-	-	0	0	?	?	1	0	0	0	0	0	-	-	0	0	0	1	?	0	0	1
Chimaerasuchus_paradoxus	1	0	?	?	0	0	0	0	2	1	0	-	0	1	1	0	0	0	1	0	0	0	1	0	?	2	1	-	?	0	1	1	-	?	?	0	0	0	?	1	0	0	0	?	1	?	?	?	?
Sphagesaurus_huenei	1	0	1	0	0	1	0	?	2	1	0	-	0	1	1	0	0	1	0	0	0	1	1	0	0	3	?	-	-	?	1	?	?	?	?	?	?	?	0	-	-	0	0	?	?	?	?	?	0
Stratiotosuchus_maxhechti	1	0	0	0	0	0	0	0	?	1	1	?	0	1	1	1	3	0	2	0	0	0	1	0	1	3	-	-	-	0	1	?	?	1	0	1	0	0	-	-	-	1	0	1	0	0	1	0	1
Pissarachampsa_sera	1	0	?	?	1	?	0	0	?	?	?	?	?	?	?	?	?	?	2	0	0	0	1	0	1	3	-	-	-	0	?	?	?	?	0	1	0	?	-	-	-	1	0	1	0	0	1	0	1
Lomasuchus_palpebrosus	1	0	0	0	0	?	?	?	?	?	?	?	0	1	1	1	0	0	2	1	0	0	0	?	0	2	?	-	?	0	1	1	-	0	-	0	0	0	0	1	0	?	0	0	?	0	?	0	1
Uberabasuchus_terrificus	1	0	0	1	0	0	0	?	0	1	1	?	0	1	1	1	?	?	2	1	0	0	0	0	0	1	1	-	?	0	1	1	-	0	-	0	0	0	0	1	0	0	0	0	0	0	0	0	?
Peirosaurus_torminni	1	0	0	0	0	0	0	?	?	1	1	0	0	1	1	1	0	0	2	?	0	?	0	0	?	?	?	-	?	0	?	?	?	0	-	0	0	0	?	-	-	?	?	0	?	0	?	0	?
Mahajangasuchus_insignis	?	?	0	0	0	?	?	?	?	0	?	?	?	1	?	?	?	0	0	1	0	0	0	?	1	2	0	-	1	?	?	1	-	0	-	1	0	0	0	0	1	0	0	0	1	0	1	0	2
Stolokrosuchus_lapparenti	1	0	0	1	0	1	0	1	0	1	1	1	0	1	1	0	0	0	1	0	0	0	0	?	1	2	1	-	?	0	1	0	0	0	-	0	0	0	0	1	0	0	0	0	0	0	0	0	2
Montsecosuchus_depereti	1	0	1	0	0	?	?	?	?	?	?	?	0	?	?	?	?	?	?	?	0	0	0	0	0	3	-	-	-	0	1	?	?	?	?	0	0	0	0	-	-	0	?	0	?	0	?	0	1
Knoetschkesuchus_guimarotae	1	0	1	0	1	0	1	0	0	0	0	1	0	1	1	0	3	0	1	1	0	0	0	0	0	1	1	-	0	0	1	0	1	1	0	0	0	0	0	0	0	0	0	0	1	0	0	0	1
Theriosuchus_pusillus	1	0	1	0	1	0	1	1	0	0	0	1	0	1	?	0	?	0	1	1	0	?	0	0	0	3	-	-	-	0	1	0	1	1	0	0	0	0	0	-	-	0	?	0	?	0	0	0	1
Calsoyasuchus_valliceps	1	0	0	1	1	2	2	1	1	0	?	0	0	1	1	0	1	0	1	0	1	0	0	?	?	1	0	-	1	0	1	0	0	1	0	0	0	0	1	0	0	0	0	1	1	0	0	0	2
Eutretauranosuchus_delfsi	1	0	0	0	1	2	2	?	2	?	?	-	?	1	?	?	?	?	1	?	1	0	?	0	0	3	-	-	-	0	1	0	0	1	0	0	0	0	0	-	-	0	0	0	0	0	0	0	1
Sunosuchus_junggarensis	1	0	0	1	?	2	2	1	2	0	0	-	0	1	1	0	?	0	1	?	1	0	?	0	1	3	?	-	-	0	1	1	-	?	0	0	0	0	0	-	-	0	0	0	?	0	0	0	?
Siamosuchus_phuphokensis	1	0	0	?	1	1	2	1	2	0	1	-	0	1	1	0	2	0	1	1	1	0	0	0	?	3	-	-	-	0	1	?	?	?	?	0	0	0	?	-	-	0	0	?	?	?	?	?	?
Goniopholis_baryglyphaeus	1	0	0	0	1	2	2	1	2	0	?	-	0	1	1	0	2	0	1	?	1	0	0	0	?	3	-	-	-	0	?	0	0	1	0	0	0	0	0	-	-	0	0	0	0	0	0	0	2
Goniopholis_simus	1	0	0	0	1	2	2	1	2	0	1	-	0	1	1	0	?	0	1	1	1	0	0	0	0	3	-	-	-	0	1	0	0	1	0	0	0	0	-	-	-	0	0	0	0	0	0	0	1
Elosuchus_broinae	1	0	0	1	0	1	2	1	2	0	0	-	1	1	1	0	0	0	1	0	0	0	?	?	1	2	1	-	0	0	1	0	0	1	0	0	0	0	0	1	1	0	0	0	0	0	0	0	1
Vectisuchus_leptognathus	1	0	0	0	?	?	?	?	?	?	?	?	?	?	?	?	?	?	?	?	?	0	0	0	0	3	-	-	-	?	?	0	0	1	0	0	0	0	0	-	-	?	?	0	?	?	0	0	?
Pholidosaurus_purbeckensis	1	0	0	1	0	2	?	?	2	?	?	-	?	1	1	0	?	0	0	0	?	?	0	?	0	3	-	-	-	0	1	0	0	1	0	0	0	0	0	-	-	0	0	0	?	0	0	0	1
Sarcosuchus_imperator	1	0	0	1	0	2	2	0	2	0	0	-	1	1	1	0	2	0	0	0	1	0	0	0	?	2	-	-	?	0	1	0	0	1	0	0	0	0	0	?	?	0	0	0	0	0	0	0	1
Oceanosuchus_boecensis	1	0	0	1	0	2	2	1	2	0	0	-	1	1	1	0	1	0	0	0	0	0	0	?	?	3	-	-	-	0	1	0	0	1	0	0	0	0	0	-	-	1	1	0	0	0	0	0	1
cf_Terminonaris_robusta	1	0	0	1	0	2	2	1	2	0	0	-	0	1	1	0	1	0	0	0	0	1	0	0	0	3	-	-	-	0	1	0	0	1	0	?	0	0	0	-	-	1	1	0	0	0	0	0	1
Terminonaris_browni	1	0	0	1	0	2	2	1	2	0	1	-	0	1	1	?	1	?	0	0	1	1	0	0	0	3	-	-	-	0	?	0	0	1	0	1	0	0	0	-	-	1	1	0	0	0	0	0	1
Chenanisuchus_lateroculi	1	0	0	0	0	2	2	1	2	0	1	-	0	1	1	0	1	0	0	0	0	0	0	0	0	3	-	-	-	0	1	0	0	1	0	1	1	0	0	-	-	0	0	0	0	0	0	0	1
Sokotosuchus_ianwilsoni	1	0	0	0	1	2	2	1	2	0	1	-	1	1	?	?	?	0	1	0	0	0	0	?	?	3	-	-	-	0	1	?	?	?	?	0	?	0	?	-	-	?	?	?	?	?	0	0	?
Hyposaurus_rogersii	1	0	0	?	0	2	2	1	2	0	?	-	?	?	?	?	?	?	0	0	0	0	0	0	0	3	-	-	-	0	?	0	0	1	0	1	0	0	0	-	-	0	0	0	0	0	0	0	1
Guarinisuchus_munizi	1	0	0	0	0	2	2	1	0	0	1	-	1	1	1	?	?	0	1	0	0	0	0	0	0	3	-	-	-	0	?	0	0	1	0	?	0	0	0	-	-	0	0	0	0	0	0	0	1
Dyrosaurus_phosphaticus	1	0	0	1	0	2	2	1	2	0	1	-	0	1	1	0	0	0	1	0	0	0	0	0	0	3	-	-	-	0	1	0	0	1	0	1	0	0	0	-	-	0	0	0	0	0	0	0	1
Atlantosuchus_coupatezi	1	0	0	1	0	2	2	?	2	0	?	-	0	1	1	1	?	0	0	0	0	0	0	?	?	3	-	-	-	0	1	0	0	1	0	0	0	0	0	-	-	0	0	0	0	0	0	0	1
Rhabdognathus_aslerensis	1	0	0	1	0	2	2	?	?	?	?	?	?	?	?	?	?	?	?	0	0	0	0	0	0	3	-	-	-	0	?	0	0	1	0	1	0	0	0	-	-	0	0	0	0	0	0	0	1
Bernissartia_fagesii	1	0	0	0	1	1	2	1	2	0	0	-	0	1	1	0	?	0	1	1	0	0	?	0	0	3	-	-	-	0	1	?	0	1	0	0	0	0	0	-	-	0	0	0	?	0	0	0	1
Susisuchus_anatoceps	1	0	0	0	0	2	2	1	2	0	0	-	0	1	1	0	?	0	0	0	0	0	0	0	0	3	-	-	-	0	1	?	?	1	0	0	0	0	?	-	-	0	0	0	0	0	0	0	1
Hylaeochampsa_vectiana	1	0	?	?	?	?	?	?	?	?	?	?	?	?	?	?	?	?	?	?	0	0	?	?	0	3	-	-	-	0	?	1	-	0	0	0	?	0	?	-	-	0	0	0	1	0	0	0	1
Allodaposuchus_precedens	1	0	0	0	1	?	2	?	2	0	0	-	0	1	?	0	?	0	1	1	0	0	?	0	0	3	-	-	-	?	?	0	0	1	0	?	?	?	0	-	-	?	?	?	?	0	?	0	1
Shamosuchus_djadochtaensis	1	0	?	?	0	1	?	1	?	?	1	?	0	1	1	0	?	0	0	1	0	0	0	0	0	3	-	-	-	0	1	1	-	1	0	0	0	0	0	-	-	0	0	0	0	0	0	0	1
Borealosuchus_formidabilis	1	0	0	1	1	2	2	1	2	0	?	-	0	1	1	0	1	0	1	1	0	0	0	0	0	3	-	-	-	0	1	0	0	1	0	0	0	0	0	-	-	0	?	0	1	0	0	0	2
Gavialis_gangeticus	1	1	0	1	0	2	2	1	2	0	0	-	1	1	1	0	2	0	1	0	0	0	0	0	0	3	-	-	-	1	-	0	0	1	0	0	0	0	0	-	-	0	0	0	0	0	0	0	1
Crocodylus_niloticus	1	0	0	0	1	1	2	1	2	0	0	-	0	1	1	0	1	0	1	1	0	0	0	0	0	3	-	-	-	0	1	0	0	1	0	0	0	0	0	-	-	0	0	0	0	0	0	0	1
Alligator_mississipiensis	1	0	0	0	1	1	2	1	0	0	1	1	0	1	1	0	1	0	0	1	0	0	0	0	0	3	-	-	-	0	1	0	0	1	0	0	0	0	0	-	-	0	0	0	1	0	0	0	1
Steneosaurus_gracilirostris	0	0	0	1	0	2	1	0	2	0	1	-	1	1	1	0	?	0	1	0	0	0	0	0	?	2	?	-	?	1	-	0	0	1	0	0	?	0	1	1	1	?	0	0	0	0	0	0	1
Teleosaurus_cadomensis	0	0	0	1	0	2	1	0	2	?	1	-	1	1	1	0	0	0	1	0	0	0	0	0	0	2	1	-	0	1	-	0	0	1	0	0	0	0	0	1	1	0	0	0	0	0	0	0	1
Steneosaurus_brevior	0	0	0	1	0	2	1	1	2	0	1	-	?	1	1	0	?	0	1	0	0	0	0	0	0	2	?	-	0	1	-	0	0	1	0	?	0	0	1	0	0	0	0	0	0	0	0	0	1
Steneosaurus_brevidens	0	?	?	?	?	2	?	?	?	?	?	?	?	?	?	?	?	?	?	0	0	0	?	0	?	?	?	-	?	1	-	0	0	1	0	?	0	0	?	0	0	0	0	0	0	?	?	?	1
Steneosaurus_bollensis	0	0	0	1	0	2	1	1	2	0	1	-	1	1	1	0	?	?	1	0	0	0	0	0	0	2	1	-	0	1	-	0	0	1	0	0	0	0	1	1	1	1	0	0	0	0	0	0	1
Platysuchus_multiscrobiculatus	1	0	0	1	0	2	1	1	2	0	1	-	1	1	1	0	?	?	1	0	0	0	0	0	0	2	1	-	0	1	-	0	0	1	0	0	0	0	1	1	1	1	0	0	0	0	0	0	1
Peipehsuchus_teleorhinus	0	0	0	1	0	2	1	1	2	0	1	-	1	1	1	0	?	0	1	0	0	0	0	0	0	2	1	-	0	1	-	0	0	1	0	0	0	0	1	1	1	?	0	0	0	0	0	0	1
Steneosaurus_leedsi	0	0	0	1	0	2	1	0	2	0	1	-	1	1	1	0	0	0	1	0	0	0	0	0	0	2	1	-	0	1	-	0	0	1	0	0	1	0	0	-	-	0	0	0	0	0	0	0	1
Steneosaurus_durobrivensis	0	0	0	1	0	2	1	0	2	0	?	-	1	1	1	0	0	0	1	0	0	0	0	0	0	3	-	-	-	1	-	0	0	1	0	0	1	0	0	-	-	0	0	?	0	0	0	0	1
Machimosaurus_buffetauti	?	0	0	0	0	2	1	0	2	0	1	-	1	1	1	0	0	0	1	0	0	0	0	0	0	3	-	-	-	1	-	0	0	1	0	0	0	0	0	-	-	0	0	0	0	0	-	0	1
Pelagosaurus_typus	1	0	0	1	0	2	1	1	2	0	1	-	0	1	1	0	0	0	1	0	0	0	0	0	0	2	1	-	0	1	-	0	0	1	0	0	1	1	1	1	0	1	0	0	0	0	0	0	1
Magyarosuchus_fitosi	?	?	?	?	?	?	?	?	?	?	?	?	?	?	?	?	?	?	?	?	?	?	?	?	?	?	?	?	?	?	?	?	?	?	?	?	?	?	?	?	?	?	?	?	?	?	?	?	?
Teleidosaurus_calvadosii	0	0	0	1	0	2	1	1	2	0	1	-	0	1	1	0	0	?	?	0	0	0	0	0	0	3	?	?	?	1	-	0	0	1	0	0	1	1	?	-	-	0	0	0	0	0	0	0	1
Eoneustes_bathonicus	0	0	0	1	0	2	?	?	?	?	?	?	0	1	1	0	?	?	?	0	0	0	0	0	?	3	-	?	0	1	-	0	1	1	0	0	?	1	1	-	-	0	0	0	0	1	0	0	1
Eoneustes_gaudryi	0	0	?	?	0	?	?	?	?	?	?	?	?	?	?	?	?	?	?	0	0	0	0	?	?	3	-	0	0	1	-	0	1	1	0	0	1	1	1	-	-	0	0	1	0	1	0	0	1
Zoneait_nargorum	?	0	?	?	?	?	?	?	?	?	?	?	?	?	?	?	?	?	?	?	?	?	?	?	?	?	?	?	?	?	?	?	?	?	?	?	?	?	?	?	?	?	?	?	?	?	0	0	1
Metriorhynchus_superciliosus	0	0	0	1	0	2	1	1	2	0	1	-	0	1	1	0	0	0	0	0	0	0	0	0	0	3	-	0	0	1	-	0	0	1	0	0	2	1	1	-	-	1	0	1	1	0	0	0	1
Gracilineustes_leedsi	0	0	0	1	0	2	?	?	?	0	?	?	?	1	1	0	0	?	0	0	0	0	0	0	0	3	-	?	?	1	-	0	0	1	0	0	2	1	1	-	-	1	?	1	1	0	0	0	1
Cricosaurus_macrospondylus	0	0	1	?	0	2	2	2	1	0	1	0	0	1	1	0	?	?	0	0	0	0	0	0	?	3	-	1	?	?	-	0	0	1	1	0	2	1	1	-	-	1	?	1	1	0	0	1	1
Cricosaurus_suevicus	0	0	0	1	0	2	2	2	1	0	1	0	0	1	1	0	0	0	0	0	0	0	0	0	0	3	-	1	2	1	-	0	0	1	0	0	2	1	1	-	-	1	0	1	1	0	0	1	1
Composite_taxon_durobrivensis	1	0	0	0	0	2	1	1	2	0	1	-	0	1	1	0	0	0	0	0	0	0	0	0	0	3	-	?	?	1	-	0	0	?	0	0	1	1	1	-	-	?	?	1	0	0	0	0	1
Composite_taxon_brachyrhynchus	1	0	0	0	0	2	1	1	2	0	1	-	0	1	1	0	0	0	0	0	0	0	0	0	0	3	-	0	2	0	0	0	0	1	0	0	1	1	1	-	-	1	0	1	0	0	0	0	1
Metriorhynchus_casamiquelai	0	0	0	0	0	2	1	1	2	0	1	-	0	1	1	0	?	0	0	0	0	0	0	0	0	3	-	?	?	1	-	0	0	1	0	0	1	1	1	-	-	?	0	1	0	0	0	0	1
Torvoneustes_coryphaeus	0	0	?	?	0	?	?	?	?	?	?	?	?	?	?	?	?	?	?	0	0	0	0	?	?	3	-	1	2	1	-	0	0	1	1	0	1	1	1	-	-	0	0	1	0	0	0	0	1
Geosaurus_giganteus	0	0	?	?	?	2	2	?	2	0	?	-	?	1	1	0	?	?	1	0	0	0	?	0	0	3	-	0	2	?	-	0	0	1	?	0	?	1	1	-	-	1	0	1	?	0	?	?	1
Geosaurus_grandis	?	0	1	0	0	2	2	1	2	0	0	-	0	1	1	0	?	0	0	?	0	0	?	0	?	3	-	?	?	0	0	0	?	1	0	0	1	1	1	-	-	?	?	1	?	0	0	1	?
Dakosaurus_andiniensis	0	0	1	0	0	2	2	1	?	0	1	?	0	1	1	0	?	?	0	0	0	0	0	0	0	3	-	0	2	1	-	0	0	1	1	0	1	1	?	-	-	1	0	1	1	0	0	1	1
Dakosaurus_maximus	0	0	?	0	0	2	2	2	?	0	1	?	0	1	1	0	?	?	0	0	0	0	0	0	0	?	?	?	?	1	-	?	?	1	?	0	1	1	?	?	-	?	?	1	1	?	?	?	1
[truncated: 359 more columns]
